# Supplementary material for: Systemic immune reaction in axillary lymph nodes adds to tumor-infiltrating lymphocytes in triple-negative breast cancer prognostication
Source: PubMed Central journal article supplement (PMC8257702; doi:10.1038/s41523-021-00292-y), 2021-07-05
Supplement: 41523_2021_292_MOESM2_ESM.pdf [file 41523_2021_292_MOESM2_ESM.pdf]

## Data Supplement

## Supplementary Figure 1.

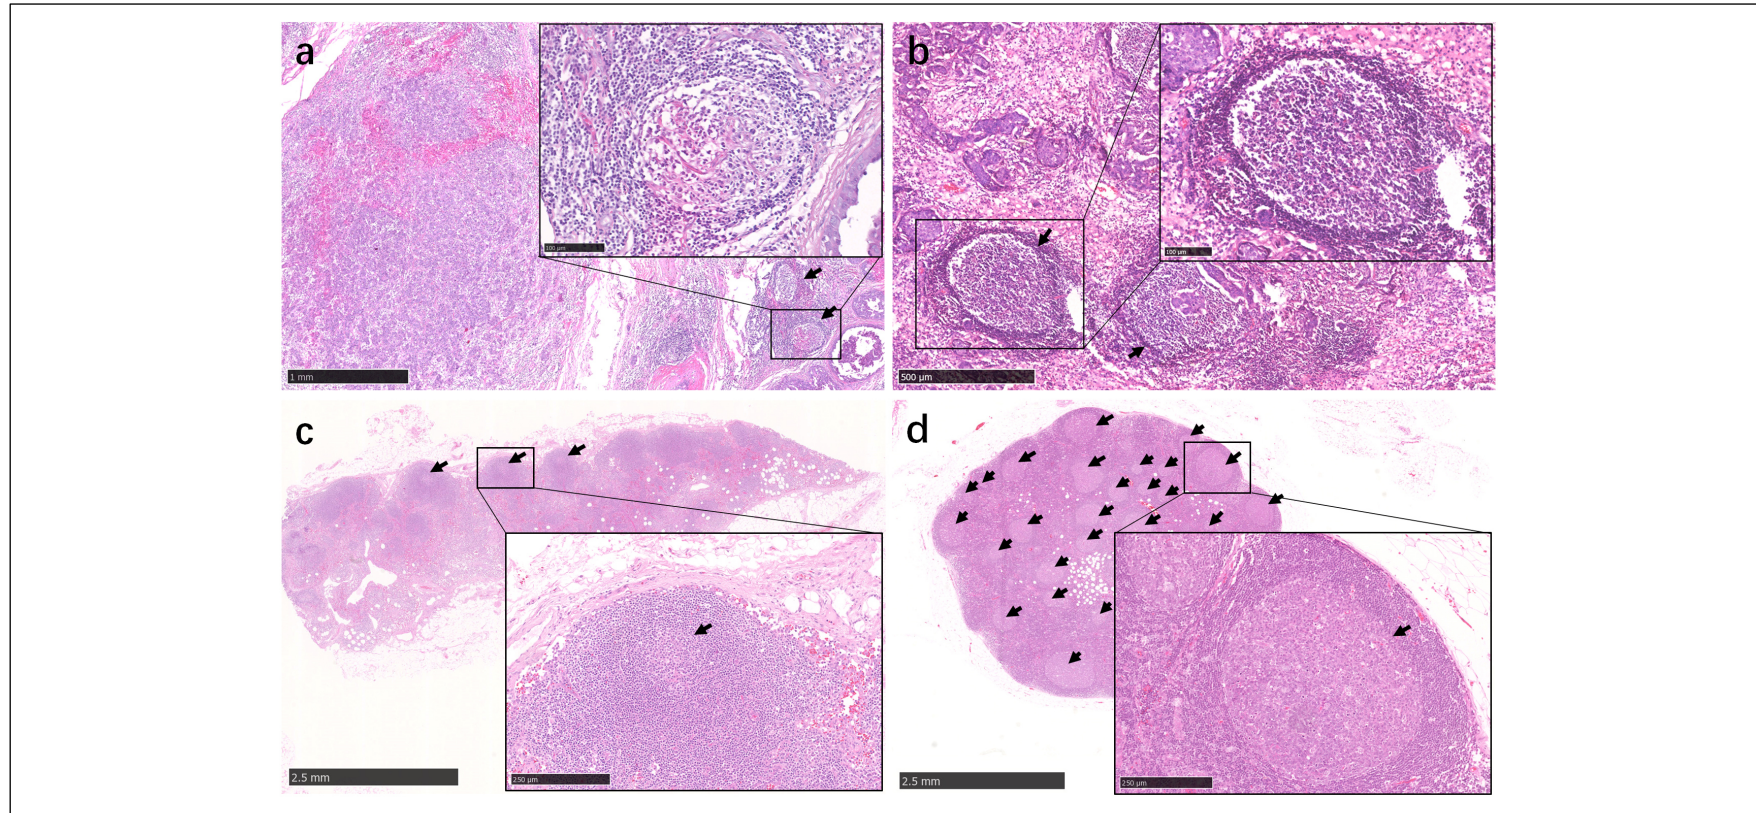

**Supplementary Figure 1. Examples of tertiary lymphoid structures (TLS) in primary tumor and germinal centers (GCs) in cancer-free lymph nodes. (a, b)** presence of TLS (with lymphoid GC formation, arrows) in the peritumoral stroma (inset showing a higher power view of TLS); **(c)** few GCs (arrow) located close to the LN capsule (predominantly in periphery) (inset showing a higher power view of GC); **(d)** numerous GC formation (arrow); larger, rounder and fuller GCs throughout the whole LN (predominantly in the central part of the LN) (inset showing a higher power view of GC).

Supplementary Figure 2.

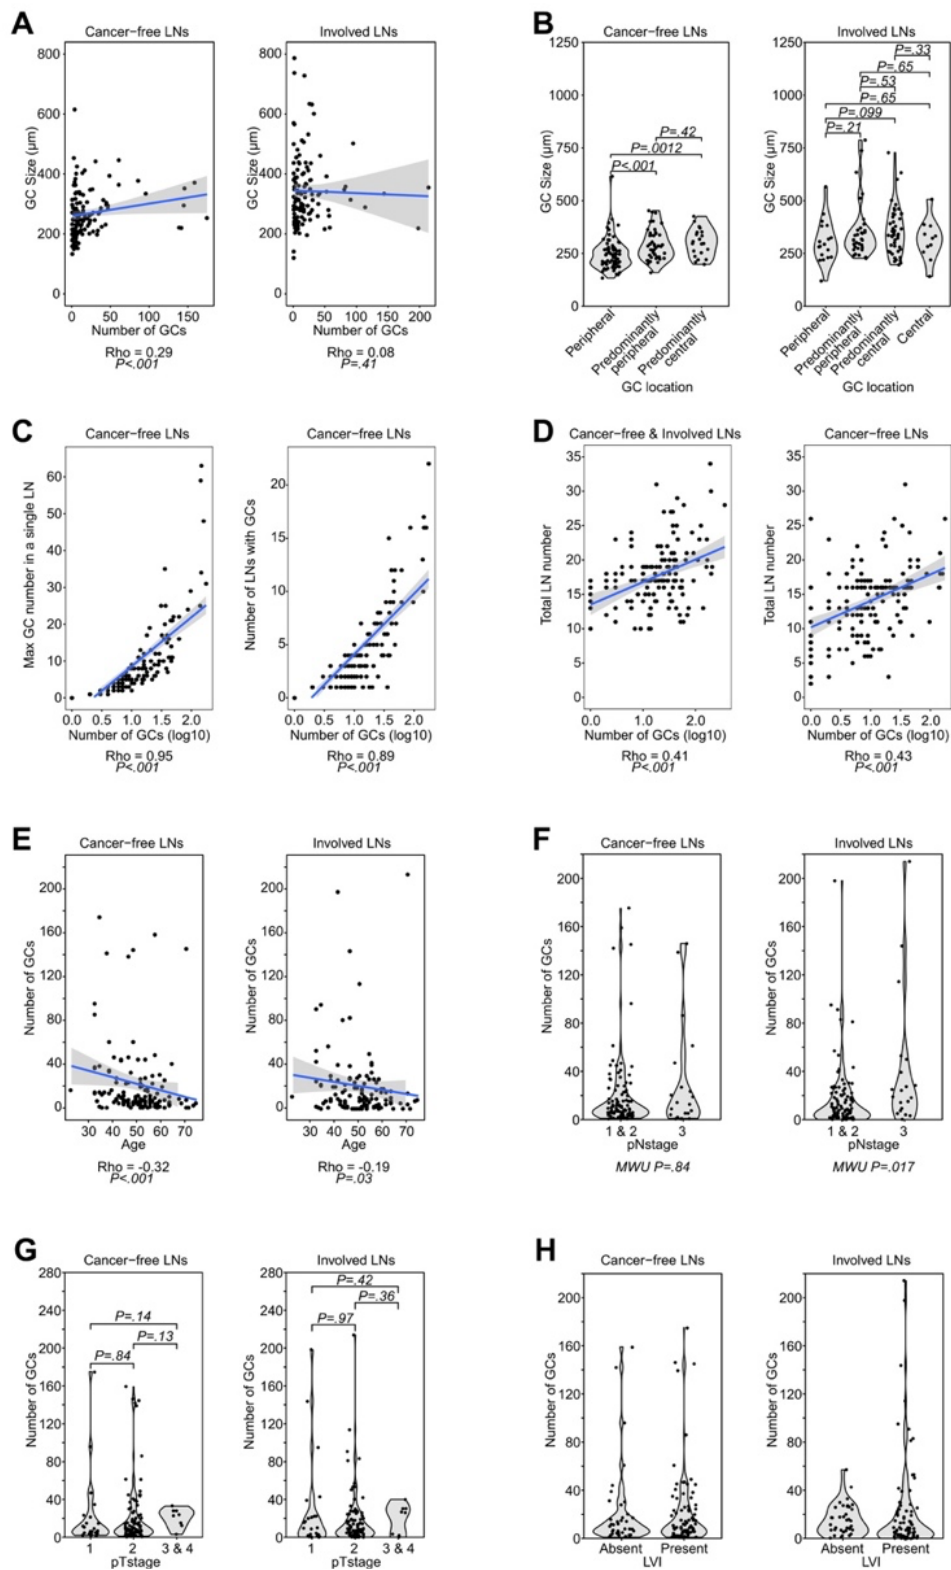

**Supplementary Figure 2. Association of the number of germinal centers in cancer-free and involved lymph nodes with clinicopathological features.**

(a) Scatter plots of the number of GCs compared to the maximum GC size. Cancer-free and involved LNs analysis is shown on the left and right, respectively. (b) Violin plot of maximum GC size in GC with regards to their predominant location in the LN (Peripheral (cancer-free n = 70 & involved n= 18), predominantly peripheral (cancer-free n = 70 & involved n = 34), predominantly central (cancer-free n = 21 & involved n= 11) and central (cancer-free n = 0 & involved n= 21)). P values displayed calculated via Mann-Whitney U tests. Cancer-free and involved LNs analysis is shown on the left and right, respectively. (c) Scatter plot of the log<sub>10</sub> number of GCs compared to the maximum number of GCs in a single LN (left side); and compared to the number of LNs which contain GCs (right side). (d) Scatter plots of the log<sub>10</sub> number of GCs in all assessed LNs (left) or cancer-free LNs (right) compared to the number of LNs (including those with zero GCs). (e) Scatter plots of the number of GCs in cancer-free LNs (left) or involved LNs (right) compared to age at diagnosis; (f) Violin plot of the number of GCs in cancer-free LNs (left) or involved LNs (right) compared to LN stage (pNstage 1&2 (n = 129) and pNstage 3 (n = 32)) ; (g) Violin plot, showing the distribution of GC formations in cancer-free LNs (left) or involved LNs (right) compared to the size of the primary tumor (pTstage 1 (n = 33), pNstage 2 (n = 116) and pNstage 3 & 4 (n = 12)). P values displayed calculated via Mann-Whitney U test; (h) Violin plots, displaying the number of GCs in cancer-free LNs (left) or involved LNs (right) compared to patients with (n = 51) and without (n = 110) lympho-vascular invasion.

Supplementary Figure 3.

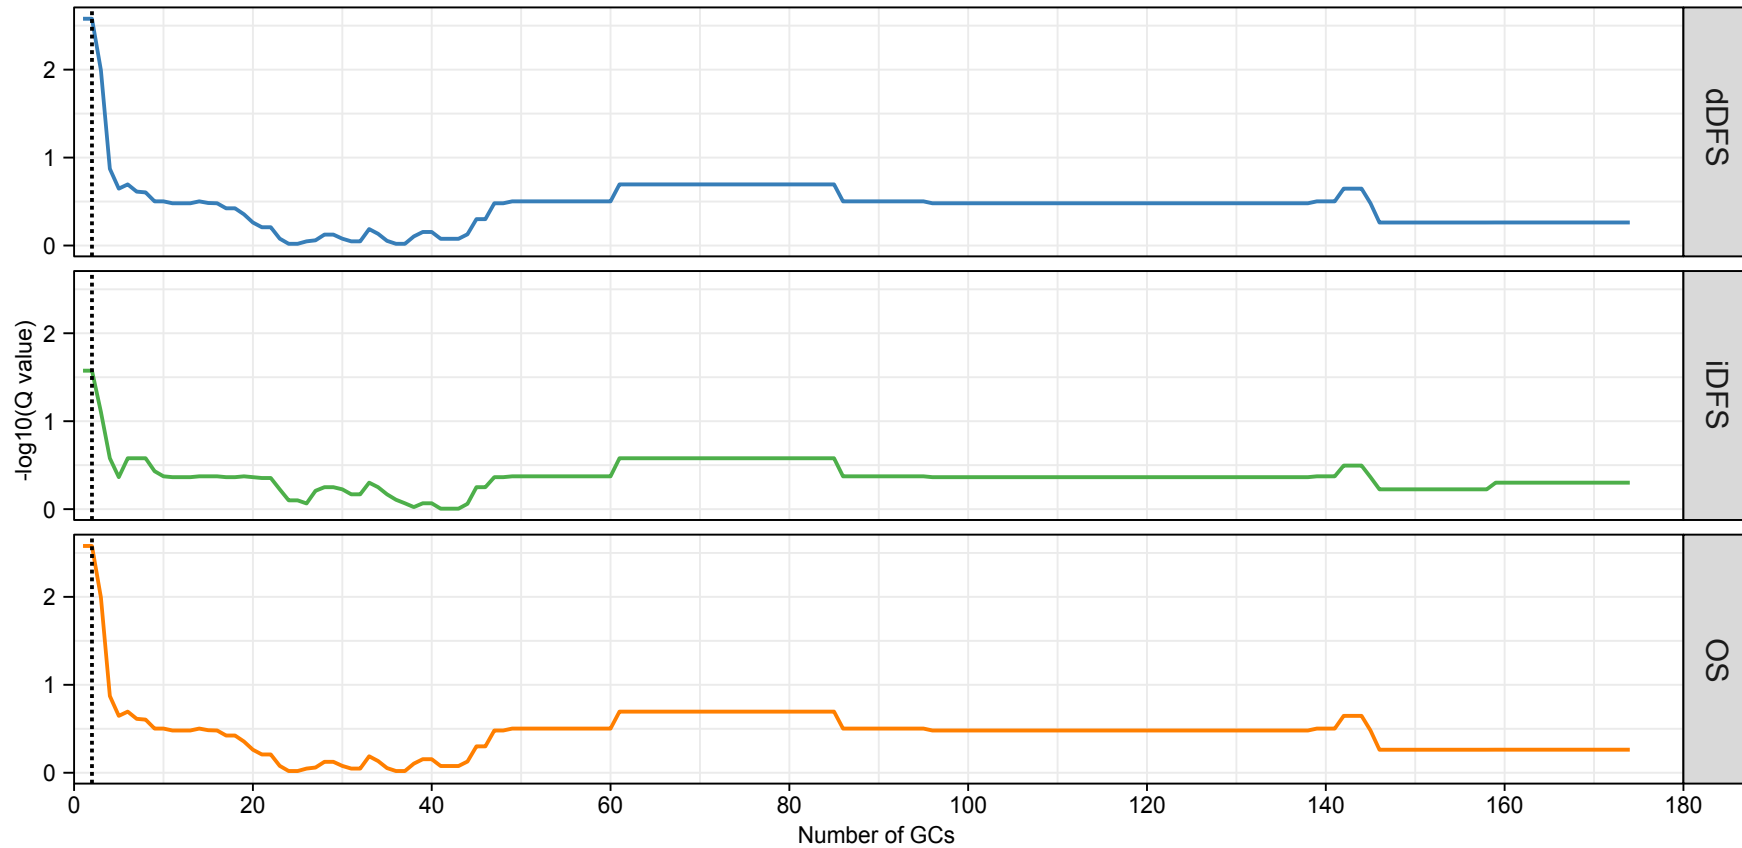

**Supplementary Figure 3. Cut off selection for defining the number of germinal centers in cancer-free lymph nodes.** The optimal germinal center number cut off was determined by taking all patients (including those with zero GCs) and applying an iterative process using a minimal p value approach. For all three endpoints a single cut-off was identified (dashed black lines) at 2 germinal centers.



**Supplementary Table 1. The distribution of total GCs in LNs excised by SLNB and ALNC.** Patients are listed who had a SLNB followed by an ALNC. For each patient, the numbers of LNs and numbers of GCs in cancer-free and involved LNs are listed separately. Within cancer-free and involved LNs, the number of LNs excised by SLNB and by ALNC (called non-SLN) are shown. The number of GCs in SLN and non-SLN, as well as the percentage of GC formation given the total number of GCs observed in all cancer-free or involved LNs (referred to as % of total) are reported. The median number of LNs, GCs and percentage of GC formation is shown.

| Patient ID    | Cancer-free LNs |               |               |        |            |               |        |            |               | Involved LNs  |               |        |            |               |        |            |     |     |
|---------------|-----------------|---------------|---------------|--------|------------|---------------|--------|------------|---------------|---------------|---------------|--------|------------|---------------|--------|------------|-----|-----|
|               | Total LNs       |               | SLN           |        |            | non-SLN       |        |            | Total LNs     |               | SLN           |        |            | non-SLN       |        |            |     |     |
|               | Number of LNs   | Number of GCs | Number of LNs | GCs    |            | Number of LNs | GCs    |            | Number of LNs | Number of GCs | Number of LNs | GCs    |            | Number of LNs | GCs    |            |     |     |
|               |                 |               |               | Number | % of total |               | Number | % of total |               |               |               | Number | % of total |               | Number | % of total |     |     |
| case 1        | 83787           | 16            | 142           | 2      | 101        | 71%           | 14     | 41         | 29%           | 2             | 57            |        | 2          | 57            | N/A    | 0          | N/A |     |
| case 2        | 84658           | 26            | 24            | 2      | 12         | 50%           | 24     | 12         | 50%           | 1             | 12            |        | 1          | 12            | N/A    | 0          | N/A |     |
| case 3        | 93074           | 16            | 7             | 2      | 6          | 86%           | 14     | 1          | 14%           | 1             | 2             |        | 1          | 2             | N/A    | 0          | N/A |     |
| case 4        | 90419           | 18            | 159           | 5      | 124        | 78%           | 13     | 35         | 22%           | 1             | 2             |        | 1          | 2             | N/A    | 0          | N/A |     |
| case 5        | 90507           | 16            | 6             | 1      | 6          | 100%          | 15     | 0          | 0%            | 1             | 0             |        | 1          | 0             | N/A    | 0          | N/A |     |
| case 6        | 91212           | 18            | 6             | 2      | 5          | 83%           | 16     | 1          | 17%           | 1             | 7             |        | 1          | 7             | N/A    | 0          | N/A |     |
| case 7        | 92028           | 11            | 12            | 2      | 8          | 67%           | 9      | 4          | 33%           | 2             | 30            |        | 2          | 30            | N/A    | 0          | N/A |     |
| case 8        | 94096           | 13            | 7             | 3      | 4          | 57%           | 10     | 3          | 43%           | 2             | 8             |        | 2          | 8             | N/A    | 0          | N/A |     |
| case 9        | 96285           | 9             | 5             | 2      | 4          | 80%           | 7      | 1          | 20%           | 3             | 7             |        | 3          | 7             | N/A    | 0          | N/A |     |
| case 10       | 100631          | 9             | 6             | 1      | 5          | 83%           | 8      | 1          | 17%           | 1             | 0             |        | 1          | 0             | N/A    | 0          | N/A |     |
| case 11       | 101812          | 20            | 61            | 5      | 47         | 77%           | 15     | 14         | 23%           | 1             | 30            |        | 1          | 30            | N/A    | 0          | N/A |     |
| case 12       | 103272          | 20            | 45            | 3      | 29         | 64%           | 17     | 16         | 36%           | 6             | 81            |        | 3          | 61            | 75%    | 3          | 20  | 25% |
| case 13       | 105096          | 18            | 34            | 3      | 24         | 71%           | 15     | 10         | 29%           | 2             | 7             |        | 2          | 7             | N/A    | 0          | N/A |     |
| case 14       | 108069          | 13            | 38            | 3      | 23         | 61%           | 10     | 15         | 39%           | 3             | 53            |        | 1          | 42            | 79%    | 2          | 11  | 21% |
| case 15       | 108630          | 20            | 4             | 2      | 2          | 50%           | 18     | 2          | 50%           | 2             | 17            |        | 1          | 14            | 82%    | 1          | 3   | 18% |
| case 16       | 108631          | 17            | 7             | 1      | 6          | 86%           | 16     | 1          | 14%           | 1             | 9             |        | 1          | 9             | N/A    | 0          | N/A |     |
| case 17       | 103813          | 24            | 16            | 3      | 11         | 69%           | 21     | 5          | 31%           | 1             | 27            |        | 1          | 27            | N/A    | 0          | N/A |     |
| case 18       | 107221          | 11            | 6             | 3      | 4          | 67%           | 8      | 2          | 33%           | 1             | 6             |        | 1          | 6             | N/A    | 0          | N/A |     |
| case 19       | 81543           | 16            | 2             | 1      | 1          | 50%           | 15     | 1          | 50%           | 2             | 0             |        | 1          | 0             | N/A    | 1          | 0   | N/A |
| case 20       | 93805           | 11            | 0             | 1      | 0          | N/A           | 10     | 0          | N/A           | 2             | 0             |        | 1          | 0             | N/A    | 1          | 0   | N/A |
| case 21       | 108731          | 16            | 0             | 2      | 0          | N/A           | 14     | 0          | N/A           | 1             | 0             |        | 1          | 0             | N/A    | 0          | N/A |     |
| case 22       | 101463          | 9             | 0             | 1      | 0          | N/A           | 8      | 0          | N/A           | 1             | 0             |        | 1          | 0             | N/A    | 0          | N/A |     |
| case 23       | 106265          | 9             | 0             | 1      | 0          | N/A           | 8      | 0          | N/A           | 1             | 0             |        | 1          | 0             | N/A    | 0          | N/A |     |
| <b>Median</b> |                 | 16            | 7             | 2      | 6          | 71%           | 14     | 2          | 29%           | 1             | 7             |        | 1          | 7             | 79%    | 0          | 3   | 21% |

Supplementary Table 2. Univariate & Multivariate Cox regression for iDFS, dDFS and OS of all cases or sTILs subgroups (< 20%, ≥ 20%)

Supplementary Table 2a. Univariate and Multivariate Cox regression analyses for iDFS

| iDFS                                                    |                                                        |           |              |             |             |             |                                                 |             |                |                |      |             |                |         |      |           |
|---------------------------------------------------------|--------------------------------------------------------|-----------|--------------|-------------|-------------|-------------|-------------------------------------------------|-------------|----------------|----------------|------|-------------|----------------|---------|------|-----------|
| Univariate                                              | All cases                                              |           |              |             |             |             | <20% sTILs                                      |             |                | ≥20% sTILs     |      |             |                |         |      |           |
| Clinicopathological features                            | Model P                                                | HR        | CI           | Model P     | HR          | CI          | Model P                                         | HR          | CI             | Model P        | HR   | CI          |                |         |      |           |
| Age at diagnosis                                        | 0.123                                                  | 1.02      | 0.99 - 1.05  | 0.110       | 1.03        | 0.99-1.06   | 0.983                                           | 1.00        | 0.94 - 1.07    |                |      |             |                |         |      |           |
| Tumor size                                              |                                                        |           |              |             |             |             |                                                 |             |                |                |      |             |                |         |      |           |
| pTstage 1                                               | 0.056                                                  | Reference |              | 0.078       | Reference   |             | Group size too small / too few events           |             |                |                |      |             |                |         |      |           |
| pTstage 2                                               |                                                        | 1.53      | 0.68 - 3.45  |             | 1.44        | 1.48 - 5.57 |                                                 |             |                |                |      |             |                |         |      |           |
| pTstage 3 & 4                                           |                                                        | 3.76      | 1.32 - 10.74 |             | 3.71        | 0.26-14.56  |                                                 |             |                |                |      |             |                |         |      |           |
| Lymph node stage                                        |                                                        |           |              |             |             |             |                                                 |             |                |                |      |             |                |         |      |           |
| pNstage 1 & 2                                           | 0.005                                                  | Reference |              | 0.154       | Reference   |             | 0.008                                           | Reference   |                |                |      |             |                |         |      |           |
| pNstage 3                                               |                                                        | 2.52      | 1.38 - 4.60  |             | 1.71        | 0.84 - 3.46 |                                                 | 5.84        | 1.69-20.21     |                |      |             |                |         |      |           |
| Lymphovascular invasion                                 | 0.194                                                  | 1.54      | 0.78 - 3.03  | 0.459       | 1.33        | 0.61 - 2.92 | 0.407                                           | 1.33        | 0.34 - 5.15    |                |      |             |                |         |      |           |
| HER2 status                                             | 1.000                                                  | 1.00      | 0.56 - 1.80  | 0.538       | 0.81        | 0.41 - 1.59 | 0.407                                           | 1.69        | 0.49 - 5.85    |                |      |             |                |         |      |           |
| sTILs                                                   |                                                        |           |              |             |             |             |                                                 |             |                |                |      |             |                |         |      |           |
| 20% cut off                                             | <0.001                                                 | 0.26      | 0.13 - 0.51  |             |             |             |                                                 |             |                |                |      |             |                |         |      |           |
| Increments                                              | <0.001                                                 | 0.96      | 0.93 - 0.98  |             |             |             |                                                 |             |                |                |      |             |                |         |      |           |
| TLS                                                     | 0.002                                                  | 0.25      | 0.09 - 0.71  | 0.010       | 0.23        | 0.05 - 0.94 | 0.355                                           | 0.50        | 0.11-2.37      |                |      |             |                |         |      |           |
| LN characteristics                                      | Cancer-free LN                                         |           |              | Involved LN |             |             | Cancer-free LN                                  |             |                | Cancer-free LN |      |             |                |         |      |           |
| Total number of GCs across all assessed LNs per patient | Model P                                                | HR        | CI           | Model P     | HR          | CI          | Model P                                         | HR          | CI             | Model P        | HR   | CI          |                |         |      |           |
| Total GCs number                                        | 0.769                                                  | 1.00      | 0.99-1.01    | 0.459       | 1.00        | 0.98-1.01   | 0.427                                           | 0.99        | 0.97 - 1.01    | 0.019          | 1.01 | 1.00 - 1.02 |                |         |      |           |
| Total GCs number (≤2 / >2)                              | <0.001                                                 | 0.33      | 0.19-0.59    | 0.023       | 0.48        | 0.26-0.88   | 0.002                                           | 0.36        | 0.19 - 0.69    | 0.804          | 1.29 | 0.16-10.16  |                |         |      |           |
| Multivariate                                            | Corrected for: Age, pTstage, pNstage, LVI, sTILs & TLS |           |              |             |             |             | Corrected for: Age, pTstage, pNstage, LVI & TLS |             |                |                |      |             |                |         |      |           |
| LN characteristics                                      | Cancer-free LN                                         |           |              |             | Involved LN |             |                                                 |             | Cancer-free LN |                |      |             | Cancer-free LN |         |      |           |
| Across all assessed LNs per patient                     | Covariate P                                            | Model P   | HR           | CI          | Covariate P | Model P     | HR                                              | CI          | Covariate P    | Model P        | HR   | CI          | Covariate P    | Model P | HR   | CI        |
| Total GCs number                                        | 0.010                                                  | <0.001    | 1.01         | 1.00 - 1.02 | 0.362       | <0.001      | 1.00                                            | 0.99 - 1.01 | 0.832          | 0.025          | 1.00 | 0.98-1.02   | 0.086          | 0.013   | 1.01 | 1.00-1.03 |
| Total GCs number (≤2 / >2)                              | 0.110                                                  | <0.001    | 0.58         | 0.30 - 1.12 | 0.161       | <0.001      | 0.63                                            | 0.33 - 1.20 | 0.023          | 0.004          | 0.41 | 0.19 -0.89  | 0.949          | 0.034   | 0.93 | 0.11-7.93 |

Supplementary Table 2b. Univariate and Multivariate Cox regression analyses for dDFS

| dDFS                                |                                                        |           |              |             |             |             |                                       |             |                                                  |                |      |             |                |         |      |             |
|-------------------------------------|--------------------------------------------------------|-----------|--------------|-------------|-------------|-------------|---------------------------------------|-------------|--------------------------------------------------|----------------|------|-------------|----------------|---------|------|-------------|
| Univariate                          | All cases                                              |           |              |             |             |             | <20% sTILs                            |             |                                                  | ≥20% sTILs     |      |             |                |         |      |             |
| Clinicopathological features        | Model P                                                | HR        | CI           | Model P     | HR          | CI          | Model P                               | HR          | CI                                               | Model P        | HR   | CI          |                |         |      |             |
| Age at diagnosis                    | 0.055                                                  | 1.03      | 1.00 - 1.06  | 0.041       | 0.103       | 1.00-       | 0.949                                 | 1.00        | 0.93 - 1.07                                      |                |      |             |                |         |      |             |
| Tumor size                          |                                                        |           |              |             |             |             |                                       |             |                                                  |                |      |             |                |         |      |             |
| pTstage 1                           | 0.017                                                  | Reference |              | 0.034       | Reference   |             | Group size too small / too few events |             |                                                  |                |      |             |                |         |      |             |
| pTstage 2                           |                                                        | 1.95      | 0.76 - 5.03  |             | 1.76        | 0.53 - 5.84 |                                       |             |                                                  |                |      |             |                |         |      |             |
| pTstage 3 & 4                       |                                                        | 5.43      | 1.72 - 17.13 |             | 5.12        | 1.32 -19.88 |                                       |             |                                                  |                |      |             |                |         |      |             |
| Lymph node stage                    |                                                        |           |              |             |             |             |                                       |             |                                                  |                |      |             |                |         |      |             |
| pNstage 1 & 2                       | 0.003                                                  | Reference |              | 0.074       | Reference   |             | 0.018                                 | Reference   |                                                  |                |      |             |                |         |      |             |
| pNstage 3                           |                                                        | 2.75      | 1.46 - 5.18  |             | 1.99        | 0.97 - 4.08 |                                       | 5.88        | 1.47-23.55                                       |                |      |             |                |         |      |             |
| Lymphovascular invasion             | 0.219                                                  | 1.54      | 0.76 - 3.13  | 0.324       | 1.50        | 0.65 - 3.44 | 0.953                                 | 0.95        | 0.23 - 4.01                                      |                |      |             |                |         |      |             |
| HER2 status                         | 0.953                                                  | 0.98      | 0.53 - 1.83  | 0.512       | 0.79        | 0.39 - 1.60 | 0.437                                 | 0.44        | 0.43 - 6.96                                      |                |      |             |                |         |      |             |
| sTILs                               |                                                        |           |              |             |             |             |                                       |             |                                                  |                |      |             |                |         |      |             |
| 20% cut off                         | <0.001                                                 | 0.22      | 0.10 - 0.48  |             |             |             |                                       |             |                                                  |                |      |             |                |         |      |             |
| Increments                          | <0.001                                                 | 0.96      | 0.93 - 0.98  |             |             |             |                                       |             |                                                  |                |      |             |                |         |      |             |
| TLS                                 | 0.001                                                  | 0.21      | 0.06 - 0.67  | 0.013       | 0.23        | 0.06 - 0.98 | 0.183                                 | 0.18        | 0.04 - 2.38                                      |                |      |             |                |         |      |             |
| LN characteristic                   | Cancer-free LN                                         |           |              | Involved LN |             |             | Cancer-free LN                        |             |                                                  | Cancer-free LN |      |             |                |         |      |             |
| Across all assessed LNs per patient | Model P                                                | HR        | CI           | Model P     | HR          | CI          | Model P                               | HR          | CI                                               | Model P        | HR   | CI          | Model P        |         |      |             |
| Total GCs number                    | 0.618                                                  | 1.00      | 0.99 - 1.01  | 0.253       | 0.98        | 0.98 - 1.01 | 0.483                                 | 0.99        | 0.97 - 1.01                                      | 0.009          | 1.02 | 1.01 - 1.03 |                |         |      |             |
| Total GCs number (≤2 / >2)          | <0.001                                                 | 0.26      | 0.14 - 0.48  | 0.038       | 0.25        | 0.25 - 0.93 | <0.001                                | 0.28        | 0.14 - 0.56                                      | 0.986          | 1.02 | 0.13 - 8.29 |                |         |      |             |
| Multivariate                        | Corrected for: Age, pTstage, pNstage, LVI, sTILs & TLS |           |              |             |             |             |                                       |             | Corrected for: Age, pTstage, pNstage, LVI, & TLS |                |      |             |                |         |      |             |
| LN characteristics                  | Cancer-free LN                                         |           |              |             | Involved LN |             |                                       |             | Cancer-free LN                                   |                |      |             | Cancer-free LN |         |      |             |
| Across all assessed LNs per patient | Covariate P                                            | Model P   | HR           | CI          | Covariate P | Model P     | HR                                    | CI          | Covariate P                                      | Model P        | HR   | CI          | Covariate P    | Model P | HR   | CI          |
| Total GCs number                    | 0.002                                                  | <0.001    | 1.01         | 1.00 - 1.02 | 0.565       | <0.001      | 1.00                                  | 0.99 - 1.01 | 0.665                                            | 0.005          | 1.00 | 0.98 - 1.03 | 0.044          | 0.007   | 1.02 | 1.00 - 1.03 |
| Total GCs number (≤2 / >2)          | 0.033                                                  | <0.001    | 0.47         | 0.23 - 0.94 | 0.21        | <0.001      | 0.64                                  | 0.32 - 1.28 | 0.009                                            | <0.001         | 0.34 | 0.17 - 0.77 | 0.665          | 0.031   | 0.61 | 0.07 - 5.64 |

Supplementary Table 2c. Univariate and Multivariate Cox regression analyses for OS

| OS                                  |                                                        |           |              |             |             |             |                                                 |             |              |                |      |             |                                       |         |      |             |
|-------------------------------------|--------------------------------------------------------|-----------|--------------|-------------|-------------|-------------|-------------------------------------------------|-------------|--------------|----------------|------|-------------|---------------------------------------|---------|------|-------------|
| Univariate                          | All cases                                              |           |              |             |             |             | <20% sTILs                                      |             |              | ≥20% sTILs     |      |             |                                       |         |      |             |
| Clinicopathological features        | Model P                                                | HR        | CI           | Model P     | HR          | CI          | Model P                                         | HR          | CI           | Model P        | HR   | CI          |                                       |         |      |             |
| Age at diagnosis                    | 0.019                                                  | 1.04      | 1.01 - 1.08  | 0.018       | 1.04        | 1.01-1.08   | 0.711                                           | 1.02        | 0.93 - 1.12  |                |      |             |                                       |         |      |             |
| Tumor size                          |                                                        |           |              |             |             |             |                                                 |             |              |                |      |             |                                       |         |      |             |
| pTstage 1                           | 0.004                                                  | Reference |              | 0.053       | Reference   |             | Group size too small / too few events           |             |              |                |      |             |                                       |         |      |             |
| pTstage 2                           |                                                        | 4.23      | 1.00 - 17.84 |             | 2.30        | 0.54 - 9.82 |                                                 |             |              |                |      |             |                                       |         |      |             |
| pTstage 3 & 4                       |                                                        | 10.80     | 2.18 - 53.54 |             | 5.96        | 1.20 -29.69 |                                                 |             |              |                |      |             |                                       |         |      |             |
| Lymph node stage                    |                                                        |           |              |             |             |             |                                                 |             |              |                |      |             |                                       |         |      |             |
| pNstage 1 & 2                       | 0.001                                                  | Reference |              | 0.087       | Reference   |             | 0.001                                           | Reference   |              |                |      |             |                                       |         |      |             |
| pNstage 3                           |                                                        | 3.34      | 1.69 - 6.63  |             | 2.01        | 0.94 - 4.34 |                                                 | 22.18       | 2.47-198.74  |                |      |             |                                       |         |      |             |
| Lymphovascular invasion             | 0.054                                                  | 2.22      | 0.92 - 5.37  | 0.429       | 1.42        | 0.58 - 3.49 | Group size too small / too few events           |             |              |                |      |             |                                       |         |      |             |
| HER2 status                         | 0.564                                                  | 1.22      | 0.62 - 2.40  | 0.980       | 0.99        | 0.47 - 2.08 | 0.310                                           | 2.50        | 0.42 - 14.96 |                |      |             |                                       |         |      |             |
| sTILs                               |                                                        |           |              |             |             |             |                                                 |             |              |                |      |             |                                       |         |      |             |
| 20% cut off                         | <0.001                                                 | 0.17      | 0.06 - 0.43  | \           |             |             | \                                               |             |              |                |      |             |                                       |         |      |             |
| Increments                          | <0.001                                                 | 0.94      | 0.91 - 0.98  | \           |             |             | \                                               |             |              |                |      |             |                                       |         |      |             |
| TLS                                 | <0.001                                                 | 0.08      | 0.01 - 0.59  | 0.005       | 0.13        | 0.02 - 0.97 | Group size too small / too few events           |             |              |                |      |             |                                       |         |      |             |
| LN characteristics                  | Cancer-free LN                                         |           |              | Involved LN |             |             | Cancer-free LN                                  |             |              | Cancer-free LN |      |             |                                       |         |      |             |
| Total number of GCs across          | Model P                                                | HR        | CI           | Model P     | HR          | CI          | Model P                                         | HR          | CI           | Model P        | HR   | CI          |                                       |         |      |             |
| Total GCs number                    | 0.951                                                  | 1.00      | 0.99-1.01    | 0.488       | 1.00        | 0.98 - 1.01 | 0.869                                           | 1.00        | 0.98 - 1.02  | 0.152          | 1.01 | 1.00 - 1.03 |                                       |         |      |             |
| Total GCs number (≤2 / >2)          | <0.001                                                 | 0.28      | 0.14 - 0.55  | 0.033       | 0.44        | 0.22 - 0.91 | 0.006                                           | 0.36        | 0.17 - 0.75  | 0.652          | 0.59 | 0.07 - 5.25 |                                       |         |      |             |
| Multivariate                        | Corrected for: Age, pTstage, pNstage, LVI, sTILs & TLS |           |              |             |             |             | Corrected for: Age, pTstage, pNstage, LVI & TLS |             |              |                |      |             |                                       |         |      |             |
| LN characteristics                  | Cancer-free LN                                         |           |              | Involved LN |             |             | Cancer-free LN                                  |             |              | Cancer-free LN |      |             |                                       |         |      |             |
| Across all assessed LNs per patient | Covariate P                                            | Model P   | HR           | CI          | Covariate P | Model P     | HR                                              | CI          | Covariate P  | Model P        | HR   | CI          | Covariate P                           | Model P | HR   | CI          |
| Total GCs number                    | 0.005                                                  | <0.001    | 1.02         | 1.00 - 1.03 | 0.092       | <0.001      | 1.01                                            | 1.00 - 1.02 | 0.163        | 0.002          | 1.01 | 1.00 - 1.03 | 0.372                                 | <0.001  | 0.96 | 0.96 - 1.02 |
| Total GCs number (≤2 / >2)          | 0.351                                                  | <0.001    | 0.69         | 0.32 - 1.50 | 0.193       | <0.001      | 0.60                                            | 0.28 - 1.29 | 0.106        | 0.001          | 0.48 | 0.20 - 1.17 | Group size too small / too few events |         |      |             |

**Supplementary Table 3. Univariate and Multivariate Cox regression analyses for iDFS, dDFS and OS of TNBC and HER2-positive subgroups**  
**Supplementary Table 3a. Univariate and Multivariate Cox regression analyses for iDFS of TNBC and HER2-positive subgroups**

|                                     | iDFS                                                   |           |             |             |             |             |                                                        |             |             |             |      |              |             |         |      |             |
|-------------------------------------|--------------------------------------------------------|-----------|-------------|-------------|-------------|-------------|--------------------------------------------------------|-------------|-------------|-------------|------|--------------|-------------|---------|------|-------------|
| Univariate                          | TNBC                                                   |           |             |             |             |             | HER2                                                   |             |             |             |      |              |             |         |      |             |
| Clinicopathological features        | Model P                                                | HR        | CI          | Model P     | HR          | CI          | Model P                                                | HR          | CI          | Model P     | HR   | CI           |             |         |      |             |
| Age at diagnosis                    | 0.076                                                  | 1.03      | 1 - 1.07    | 0.921       | 1.00        | 0.95 - 1.06 |                                                        |             |             |             |      |              |             |         |      |             |
| Tumor size                          |                                                        |           |             |             |             |             |                                                        |             |             |             |      |              |             |         |      |             |
| pTstage 1                           | 0.260                                                  | Reference |             | 0.206       | Reference   |             |                                                        | 1.66        | 0.38 - 7.38 |             | 4.97 | 0.83 - 29.83 |             |         |      |             |
| pTstage 2                           |                                                        | 1.47      | 0.55 - 3.92 |             |             |             |                                                        |             |             |             |      |              |             |         |      |             |
| pTstage 3 & 4                       |                                                        | 3.16      | 0.85 - 11.8 |             |             |             |                                                        |             |             |             |      |              |             |         |      |             |
| Lymph node stage                    |                                                        |           |             |             |             |             |                                                        |             |             |             |      |              |             |         |      |             |
| pNstage 1 & 2                       | 0.043                                                  | Reference |             | 0.049       | Reference   |             |                                                        | 2.64        | 1.04 - 6.7  |             |      |              |             |         |      |             |
| pNstage 3                           |                                                        | 2.48      | 1.1 - 5.6   |             |             |             |                                                        |             |             |             |      |              |             |         |      |             |
| Lymphovascular invasion             | 0.218                                                  | 1.64      | 0.73 - 3.71 | 0.616       | 1.36        | 0.39 - 4.7  |                                                        |             |             |             |      |              |             |         |      |             |
| sTILs                               |                                                        |           |             |             |             |             |                                                        |             |             |             |      |              |             |         |      |             |
| 20% cut off                         | <0.001                                                 | 0.19      | 0.07 - 0.49 | 0.064       | 0.40        | 0.14 - 1.11 |                                                        |             |             |             |      |              |             |         |      |             |
| Increments                          | 0.002                                                  | 0.96      | 0.93 - 0.99 | 0.010       | 0.96        | 0.92 - 1    |                                                        |             |             |             |      |              |             |         |      |             |
| TLS                                 | 0.010                                                  | 0.22      | 0.05 - 0.92 | 0.065       | 0.30        | 0.07 - 1.32 |                                                        |             |             |             |      |              |             |         |      |             |
| LN characteristics                  | Cancer-free LN                                         |           |             | Involved LN |             |             | Cancer-free LN                                         |             |             | Involved LN |      |              |             |         |      |             |
|                                     | Model P                                                | HR        | CI          | Model P     | HR          | CI          | Model P                                                | HR          | CI          | Model P     | HR   | CI           |             |         |      |             |
| Total GCs number                    | 0.161                                                  | 1.01      | 1 - 1.02    | 0.740       | 1.00        | 0.99 - 1.01 | 0.023                                                  | 0.95        | 0.9 - 1.01  | 0.079       | 0.98 | 0.94 - 1.01  |             |         |      |             |
| Total GCs number (≤2 / >2)          | <0.001                                                 | 0.25      | 0.12 - 0.52 | 0.004       | 0.32        | 0.15 - 0.67 | 0.139                                                  | 0.49        | 0.19 - 1.24 | 0.849       | 1.13 | 0.32 - 3.96  |             |         |      |             |
| Multivariate                        | Corrected for: Age, pTstage, pNstage, LVI, sTILs & TLS |           |             |             |             |             | Corrected for: Age, pTstage, pNstage, LVI, sTILs & TLS |             |             |             |      |              |             |         |      |             |
| LN characteristics                  | Cancer-free LN                                         |           |             | Involved LN |             |             | Cancer-free LN                                         |             |             | Involved LN |      |              |             |         |      |             |
| Across all assessed LNs per patient | Covariate P                                            | Model P   | HR          | CI          | Covariate P | Model P     | HR                                                     | CI          | Covariate P | Model P     | HR   | CI           | Covariate P | Model P | HR   | CI          |
| Total GCs number                    | <0.001                                                 | <0.001    | 1.01        | 1.01 - 1.03 | 0.110       | <0.001      | 1.00                                                   | 1.00 - 1.02 | 0.127       | 0.046       | 0.94 | 0.87 - 1.02  | 0.260       | 0.169   | 0.93 | 0.93 - 1.02 |
| Total GCs number (≤2 / >2)          | 0.017                                                  | <0.001    | 0.37        | 0.16 - 0.84 | 0.092       | <0.001      | 0.50                                                   | 0.22 - 1.12 | 0.959       | 0.144       | 0.97 | 0.26 - 3.59  | 0.713       | 0.261   | 1.27 | 0.35 - 4.63 |



Supplementary Table 3b. Univariate and Multivariate Cox regression analyses for dDFS of TNBC and HER2-positive subgroups

|                                     | dDFS                                                   |         |           |             |              |         |                |             |                |                                                        |              |             |             |         |             |             |
|-------------------------------------|--------------------------------------------------------|---------|-----------|-------------|--------------|---------|----------------|-------------|----------------|--------------------------------------------------------|--------------|-------------|-------------|---------|-------------|-------------|
| Univariate                          | TNBC                                                   |         |           |             |              |         | HER2           |             |                |                                                        |              |             |             |         |             |             |
| Clinicopathological features        | Model P                                                |         | HR        |             | CI           |         | Model P        |             | HR             |                                                        | CI           |             |             |         |             |             |
| Age at diagnosis                    | 0.035                                                  |         | 1.04      |             | 1 - 1.08     |         | 0.780          |             | 1.01           |                                                        | 0.95 - 1.07  |             |             |         |             |             |
| Tumor size                          |                                                        |         | Reference |             |              |         |                |             | Reference      |                                                        |              |             |             |         |             |             |
| pTstage 1                           | 0.082                                                  |         | Reference |             |              |         | 0.168          |             | Reference      |                                                        |              |             |             |         |             |             |
| pTstage 2                           |                                                        |         | 2.37      |             | 0.7 - 8.02   |         |                |             | 1.37           |                                                        | 0.30 - 6.20  |             |             |         |             |             |
| pTstage 3 & 4                       |                                                        |         | 5.41      |             | 1.21 - 24.21 |         |                |             | 5.11           |                                                        | 0.85 - 30.71 |             |             |         |             |             |
| Lymph node stage                    |                                                        |         | Reference |             |              |         |                |             | Reference      |                                                        |              |             |             |         |             |             |
| pNstage 1 & 2                       | 0.021                                                  |         | Reference |             |              |         | 0.060          |             | Reference      |                                                        |              |             |             |         |             |             |
| pNstage 3                           |                                                        |         | 2.90      |             | 1.26 - 6.69  |         |                |             | 2.68           |                                                        | 0.99 - 7.21  |             |             |         |             |             |
| Lymphovascular invasion             | 0.404                                                  |         | 1.42      |             | 0.62 - 3.26  |         | 0.310          |             | 2.02           |                                                        | 0.46 - 8.90  |             |             |         |             |             |
| sTILs                               |                                                        |         |           |             |              |         |                |             |                |                                                        |              |             |             |         |             |             |
| 20% cut off                         | <0.001                                                 |         | 0.16      |             | 0.06 - 0.47  |         | 0.051          |             | 0.35           |                                                        | 0.11 - 1.09  |             |             |         |             |             |
| increments                          | 0.002                                                  |         | 0.96      |             | 0.93 - 0.99  |         | 0.012          |             | 0.95           |                                                        | 0.91 - 1.00  |             |             |         |             |             |
| TLS                                 | 0.022                                                  |         | 0.25      |             | 0.06 - 1.05  |         | 0.018          |             | 0.16           |                                                        | 0.02 - 1.19  |             |             |         |             |             |
| LN characteristics                  | Cancer-free LN                                         |         |           | Involved LN |              |         | Cancer-free LN |             |                | Involved LN                                            |              |             |             |         |             |             |
|                                     | Model P                                                |         | HR        | CI          | Model P      |         | HR             | CI          | Model P        |                                                        | HR           | CI          |             |         |             |             |
| Total GCs number                    | 0.120                                                  |         | 1.01      | 1.00 - 1.02 | 0.962        |         | 1.00           | 0.99 - 1.01 | 0.015          |                                                        | 0.94         | 0.88 - 1.01 | 0.024       | 0.96    | 0.91 - 1.01 |             |
| Total GCs number (≤2 / >2)          | <0.001                                                 |         | 0.20      | 0.09 - 0.44 | 0.015        |         | 0.36           | 0.17 - 0.79 | 0.057          |                                                        | 0.38         | 0.14 - 1.01 | 0.910       | 0.93    | 0.26 - 3.33 |             |
| Multivariate                        | Corrected for: Age, pTstage, pNstage, LVI, sTILs & TLS |         |           |             |              |         |                |             |                | Corrected for: Age, pTstage, pNstage, LVI, sTILs & TLS |              |             |             |         |             |             |
| LN characteristics                  | Cancer-free LN                                         |         |           |             | Involved LN  |         |                |             | Cancer-free LN |                                                        |              |             | Involved LN |         |             |             |
| Across all assessed LNs per patient | Covariate P                                            | Model P | HR        | CI          | Covariate P  | Model P | HR             | CI          | Covariate P    | Model P                                                | HR           | CI          | Covariate P | Model P | HR          | CI          |
| Total GCs number                    | <0.001                                                 | <0.001  | 1.02      | 1.01 - 1.03 | 0.429        | <0.001  | 1.01           | 0.99 - 1.02 | 0.200          | 0.011                                                  | 0.96         | 0.90 - 1.02 | 0.089       | 0.007   | 0.95        | 0.90 - 1.01 |
| Total GCs number (≤2 / >2)          | 0.004                                                  | <0.001  | 0.29      | 0.13 - 0.67 | 0.034        | <0.001  | 0.43           | 0.20 - 0.94 | 0.375          | 0.037                                                  | 0.60         | 0.2 - 1.84  | 0.970       | 0.069   | 0.98        | 0.27 - 3.57 |

Supplementary Table 3c. Univariate and Multivariate Cox regression analyses for OS of TNBC and HER2-positive subgroups

|                                                         | OS                                                     |           |               |             |             |              |                                                        |             |             |             |      |             |             |         |      |             |
|---------------------------------------------------------|--------------------------------------------------------|-----------|---------------|-------------|-------------|--------------|--------------------------------------------------------|-------------|-------------|-------------|------|-------------|-------------|---------|------|-------------|
| Univariate                                              | TNBC                                                   |           |               |             |             |              | HER2                                                   |             |             |             |      |             |             |         |      |             |
| Clinicopathological features                            | Model P                                                | HR        | CI            | Model P     | HR          | CI           | Model P                                                | HR          | CI          | Model P     | HR   | CI          |             |         |      |             |
| Age at diagnosis                                        | 0.012                                                  | 1.06      | 1.01- 1.11    | 0.714       | 1.01        | 0.95 - 1.07  |                                                        |             |             |             |      |             |             |         |      |             |
| <b>Tumor size</b>                                       |                                                        |           |               |             |             |              |                                                        |             |             |             |      |             |             |         |      |             |
| pTstage 1                                               | 0.040                                                  | Reference |               | 0.095       | Reference   |              |                                                        |             |             |             |      |             |             |         |      |             |
| pTstage 2                                               |                                                        | 5.50      | 0.73 - 41.63  |             | 2.91        | 1.01 - 22.56 |                                                        |             |             |             |      |             |             |         |      |             |
| pTstage 3 & 4                                           |                                                        | 11.39     | 1.18 - 109.58 |             | 9.74        | 0.38 - 93.94 |                                                        |             |             |             |      |             |             |         |      |             |
| <b>Lymph node stage</b>                                 |                                                        |           |               |             |             |              |                                                        |             |             |             |      |             |             |         |      |             |
| pNstage 1 & 2                                           | 0.009                                                  | Reference |               | 0.052       | Reference   |              |                                                        |             |             |             |      |             |             |         |      |             |
| pNstage 3                                               |                                                        | 3.89      | 1.53 - 9.89   |             | 2.84        | 1.03 - 7.85  |                                                        |             |             |             |      |             |             |         |      |             |
| Lymphovascular invasion                                 | 0.267                                                  | 1.74      | 0.63 - 4.84   | 0.086       | 4.22        | 0.55 - 32.1  |                                                        |             |             |             |      |             |             |         |      |             |
| <b>sTILs</b>                                            |                                                        |           |               |             |             |              |                                                        |             |             |             |      |             |             |         |      |             |
| 20% cut off                                             | <0.001                                                 | 0.11      | 0.03 - 0.47   | 0.019       | 0.26        | 0.07 - 0.91  |                                                        |             |             |             |      |             |             |         |      |             |
| increments                                              | 0.002                                                  | 0.95      | 0.9 - 0.99    | 0.004       | 0.94        | 0.89 - 0.99  |                                                        |             |             |             |      |             |             |         |      |             |
| TLS                                                     | Group size too small / too few events                  |           |               |             |             |              | 0.026                                                  | 0.17        | 0.02 - 1.28 |             |      |             |             |         |      |             |
| <b>LN characteristics</b>                               | Cancer-free LN                                         |           |               | Involved LN |             |              | Cancer-free LN                                         |             |             | Involved LN |      |             |             |         |      |             |
| Total number of GCs across all assessed LNs per patient | Model P                                                | HR        | CI            | Model P     | HR          | CI           | Model P                                                | HR          | CI          | Model P     | HR   | CI          |             |         |      |             |
| Total GCs number                                        | 0.301                                                  | 1.01      | 1.00 - 1.02   | 0.565       | 1.00        | 0.99 - 1.02  | 0.019                                                  | 0.94        | 0.88 - 1.01 | 0.027       | 0.96 | 0.91 - 1.01 |             |         |      |             |
| Total GCs number (≤2 / >2)                              | 0.004                                                  | 0.24      | 0.10 - 0.60   | 0.013       | 0.31        | 0.12 - 0.75  | 0.036                                                  | 0.33        | 0.12 - 0.92 | 0.848       | 0.88 | 0.24 - 3.20 |             |         |      |             |
| <b>Multivariate</b>                                     | Corrected for: Age, pTstage, pNstage, LVI, sTILs & TLS |           |               |             |             |              | Corrected for: Age, pTstage, pNstage, LVI, sTILs & TLS |             |             |             |      |             |             |         |      |             |
| <b>LN characteristics</b>                               | Cancer-free LN                                         |           |               | Involved LN |             |              | Cancer-free LN                                         |             |             | Involved LN |      |             |             |         |      |             |
| Across all assessed LNs per patient                     | Covariate P                                            | Model P   | HR            | CI          | Covariate P | Model P      | HR                                                     | CI          | Covariate P | Model P     | HR   | CI          | Covariate P | Model P | HR   | CI          |
| Total GCs number                                        | 0.002                                                  | <0.001    | 1.02          | 1.01 - 1.03 | 0.080       | <0.001       | 1.01                                                   | 1.00 - 1.03 | 0.401       | 0.015       | 0.96 | 0.88 - 1.05 | 0.236       | 0.058   | 0.96 | 0.91 - 1.02 |
| Total GCs number (≤2 / >2)                              | 0.119                                                  | <0.001    | 0.46          | 0.17 - 1.22 | 0.077       | <0.001       | 0.40                                                   | 0.15 - 1.10 | 0.851       | 0.021       | 1.14 | 0.28 - 4.72 | 0.751       | 0.102   | 1.24 | 0.33 - 4.71 |

**Supplementary Table 4. Multivariate Cox regression analyses for iDFS, dDFS and OS comparing the prognostic value of the proportion of LNs with GCs and the ratio of GCs in LNs**

| Multivariate analysis                                    |                   |                |      |              |                   |                |       |                |  |
|----------------------------------------------------------|-------------------|----------------|------|--------------|-------------------|----------------|-------|----------------|--|
| corrected for Age, pTstage, pNstage, LVI & TLS           |                   |                |      |              |                   |                |       |                |  |
| Covariate                                                | <20% sTILs        |                |      |              | ≥20% sTILs        |                |       |                |  |
|                                                          | Covariate P value | Model P values | HR   | CI           | Covariate P value | Model P values | HR    | CI             |  |
| <b>iDFS</b>                                              |                   |                |      |              |                   |                |       |                |  |
| Proportion of LNs with GC (Involved and cancer-free LNs) | 0.236             | 0.015          | 0.20 | 0.01 - 2.88  | 0.058             | 0.010          | 33.34 | 0.89 - 1255.32 |  |
| Proportion of LNs with GC (cancer-free LNs)              | 0.607             | 0.023          | 0.54 | 0.05 - 5.58  | 0.037             | 0.007          | 14.92 | 1.18 - 187.97  |  |
| Proportion of LNs with GC (Involved LNs)                 | 0.136             | 0.021          | 0.47 | 0.17 - 1.27  | 0.490             | 0.039          | 0.44  | 0.04 - 4.55    |  |
| Total GCs / Total LNs (Involved and cancer-free)         | 0.938             | 0.026          | 0.99 | 0.73 - 1.33  | 0.069             | 0.012          | 1.20  | 0.99 - 1.46    |  |
| Total GCs / Total LNs (cancer-free)                      | 0.823             | 0.025          | 0.96 | 0.64 - 1.42  | 0.009             | 0.004          | 1.37  | 1.08 - 1.73    |  |
| Total GCs / Total LNs (Involved)                         | 0.250             | 0.026          | 0.95 | 0.87 - 1.04  | 0.603             | 0.041          | 0.98  | 0.93 - 1.04    |  |
| <b>dDFS</b>                                              |                   |                |      |              |                   |                |       |                |  |
| Proportion of LNs with GC (Involved and cancer-free LNs) | 0.129             | 0.002          | 0.10 | 0.01 - 1.94  | 0.040             | 0.007          | 66.23 | 1.22 - 3602.85 |  |
| Proportion of LNs with GC (cancer-free LNs)              | 0.542             | 0.004          | 0.46 | 0.04 - 5.49  | 0.024             | 0.004          | 32.03 | 1.58 - 650.92  |  |
| Proportion of LNs with GC (Involved LNs)                 | 0.095             | 0.004          | 0.40 | 0.13 - 1.17  | 0.844             | 0.040          | 0.77  | 0.05 - 10.95   |  |
| Total GCs / Total LNs (Involved and cancer-free)         | 0.585             | 0.004          | 0.90 | 0.62 - 1.31  | 0.068             | 0.012          | 1.20  | 0.99 - 1.46    |  |
| Total GCs / Total LNs (cancer-free)                      | 0.890             | 0.005          | 0.97 | 0.64 - 1.47  | 0.025             | 0.006          | 1.33  | 1.04 - 1.70    |  |
| Total GCs / Total LNs (Involved)                         | 0.034             | 0.001          | 0.87 | 0.76 - 0.99  | 0.143             | 0.011          | 0.85  | 0.69 - 1.06    |  |
| <b>OS</b>                                                |                   |                |      |              |                   |                |       |                |  |
| Proportion of LNs with GC (Involved and cancer-free LNs) | 0.765             | 0.003          | 0.63 | 0.03 - 13.42 | 0.443             | <0.001         | 0.05  | 0 - 116.27     |  |
| Proportion of LNs with GC (cancer-free LNs)              | 0.470             | 0.003          | 2.51 | 0.21 - 30.25 | 0.521             | <0.001         | 0.19  | 0 - 30.14      |  |
| Proportion of LNs with GC (Involved LNs)                 | 0.154             | 0.005          | 0.42 | 0.13 - 1.39  | 0.541             | <0.001         | 0.25  | 0 - 20.97      |  |
| Total GCs / Total LNs (Involved and cancer-free)         | 0.602             | 0.003          | 1.10 | 0.78 - 1.55  | 0.431             | <0.001         | 0.80  | 0.46 - 1.39    |  |
| Total GCs / Total LNs (cancer-free)                      | 0.305             | 0.002          | 1.20 | 0.85 - 1.70  | 0.424             | <0.001         | 0.80  | 0.46 - 1.39    |  |
| Total GCs / Total LNs (Involved)                         | 0.066             | 0.002          | 0.88 | 0.76 - 1.01  | 0.677             | <0.001         | 0.93  | 0.65 - 1.32    |  |

| Multivariate analysis                                    |                   |                |       |               |                   |                |      |              |  |
|----------------------------------------------------------|-------------------|----------------|-------|---------------|-------------------|----------------|------|--------------|--|
| corrected for Age, pTstage, pNstage, LVI, TLS & sTILs    |                   |                |       |               |                   |                |      |              |  |
| Covariate                                                | TNBC              |                |       |               | HER2              |                |      |              |  |
|                                                          | Covariate P value | Model P values | HR    | CI            | Covariate P value | Model P values | HR   | CI           |  |
| <b>iDFS</b>                                              |                   |                |       |               |                   |                |      |              |  |
| Proportion of LNs with GC (Involved and cancer-free LNs) | 0.178             | 0.001          | 4.41  | 0.51 - 38.29  | 0.547             | 0.129          | 0.37 | 0.01 - 9.5   |  |
| Proportion of LNs with GC (cancer-free LNs)              | 0.055             | <0.001         | 5.77  | 0.96 - 34.56  | 0.734             | 0.139          | 0.57 | 0.02 - 14.08 |  |
| Proportion of LNs with GC (Involved LNs)                 | 0.212             | 0.001          | 0.50  | 0.17 - 1.48   | 0.826             | 0.268          | 1.23 | 0.2 - 7.55   |  |
| Total GCs / Total LNs (Involved and cancer-free)         | 0.002             | <0.001         | 1.25  | 1.08 - 1.45   | 0.277             | 0.092          | 0.76 | 0.46 - 1.25  |  |
| Total GCs / Total LNs (cancer-free)                      | <0.001            | <0.001         | 1.41  | 1.17 - 1.7    | 0.699             | 0.137          | 0.91 | 0.57 - 1.46  |  |
| Total GCs / Total LNs (Involved)                         | 0.692             | 0.001          | 0.98  | 0.91 - 1.07   | 0.719             | 0.261          | 0.99 | 0.94 - 1.04  |  |
| <b>dDFS</b>                                              |                   |                |       |               |                   |                |      |              |  |
| Proportion of LNs with GC (Involved and cancer-free LNs) | 0.124             | <0.001         | 5.99  | 0.61 - 58.74  | 0.154             | 0.029          | 0.07 | 0 - 2.74     |  |
| Proportion of LNs with GC (cancer-free LNs)              | 0.030             | <0.001         | 8.08  | 1.23 - 53.1   | 0.588             | 0.054          | 0.38 | 0.01 - 12.86 |  |
| Proportion of LNs with GC (Involved LNs)                 | 0.356             | <0.001         | 0.58  | 0.19 - 1.83   | 0.549             | 0.156          | 0.55 | 0.08 - 3.88  |  |
| Total GCs / Total LNs (Involved and cancer-free)         | 0.003             | <0.001         | 1.27  | 1.08 - 1.49   | 0.073             | 0.015          | 0.52 | 0.25 - 1.06  |  |
| Total GCs / Total LNs (cancer-free)                      | <0.001            | <0.001         | 1.46  | 1.19 - 1.78   | 0.124             | 0.021          | 0.48 | 0.19 - 1.23  |  |
| Total GCs / Total LNs (Involved)                         | 0.186             | <0.001         | 0.91  | 0.8 - 1.04    | 0.228             | 0.078          | 0.92 | 0.8 - 1.05   |  |
| <b>OS</b>                                                |                   |                |       |               |                   |                |      |              |  |
| Proportion of LNs with GC (Involved and cancer-free LNs) | 0.109             | 6.80E-06       | 9.83  | 0.6 - 161.44  | 0.530             | 0.02           | 0.30 | 0.01 - 13.32 |  |
| Proportion of LNs with GC (cancer-free LNs)              | 0.023             | 2.51E-06       | 14.40 | 1.45 - 142.92 | 0.747             | 0.02           | 1.87 | 0.04 - 82.66 |  |
| Proportion of LNs with GC (Involved LNs)                 | 0.286             | 1.35E-05       | 0.49  | 0.13 - 1.82   | 0.604             | 0.10           | 0.58 | 0.08 - 4.47  |  |
| Total GCs / Total LNs (Involved and cancer-free)         | 0.020             | 2.29E-06       | 1.29  | 1.04 - 1.59   | 0.298             | 0.01           | 0.71 | 0.37 - 1.36  |  |
| Total GCs / Total LNs (cancer-free)                      | 0.004             | 1.18E-06       | 1.44  | 1.12 - 1.85   | 0.454             | 0.02           | 0.73 | 0.33 - 1.65  |  |
| Total GCs / Total LNs (Involved)                         | 0.490             | 1.81E-05       | 0.95  | 0.81 - 1.1    | 0.302             | 0.06           | 0.93 | 0.82 - 1.06  |  |
